# Supplementary material for: Mesoporous multi-valence manganese oxides composite nanotubes boosting long-life lithium-ion batteries
Source: Royal Society of Chemistry journal article supplement (doi:10.1039/d2dt03231g), 2022-01-01
Supplement: d2dt03231g1.pdf [file d2dt03231g1.pdf]

## Supporting Information: Mesoporous Multi-Valence Manganese Oxides Composite Nanotubes Boosting Long-Life Lithium-Ion Batteries

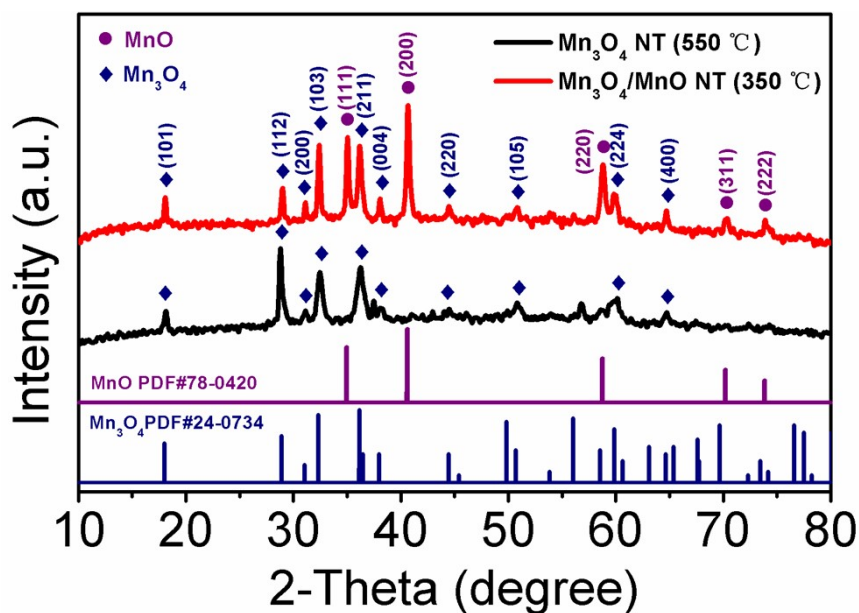

**Fig.S1** XRD patterns for Reference group ( $\beta$ - $\text{MnO}_2$  nanotubes with C-coating) annealing at 300 °C and 500 °C.

**Tab.S1** Comparison of the actual crystalline phase of experimental group and reference group.

| Annealing temperature     |                   | Room                        | 300°C                                                   | 500 °C                             |
|---------------------------|-------------------|-----------------------------|---------------------------------------------------------|------------------------------------|
| <b>Experimental group</b> | Subjects          | $\beta$ - $\text{MnO}_2$ NT | $\beta$ - $\text{MnO}_2$ NT@PDA                         | $\beta$ - $\text{MnO}_2$ NT@PDA    |
|                           | Crystalline phase | $\beta$ - $\text{MnO}_2$    | $\beta$ - $\text{MnO}_2/\text{Mn}_3\text{O}_4@\text{C}$ | $\text{Mn}_3\text{O}_4@\text{C}$   |
| <b>Reference group</b>    | Subjects          | $\beta$ - $\text{MnO}_2$ NT | $\beta$ - $\text{MnO}_2$ NT                             | $\beta$ - $\text{MnO}_2$ NT        |
|                           | Crystalline phase | $\beta$ - $\text{MnO}_2$    | $\text{Mn}_3\text{O}_4$                                 | $\text{Mn}_3\text{O}_4/\text{MnO}$ |

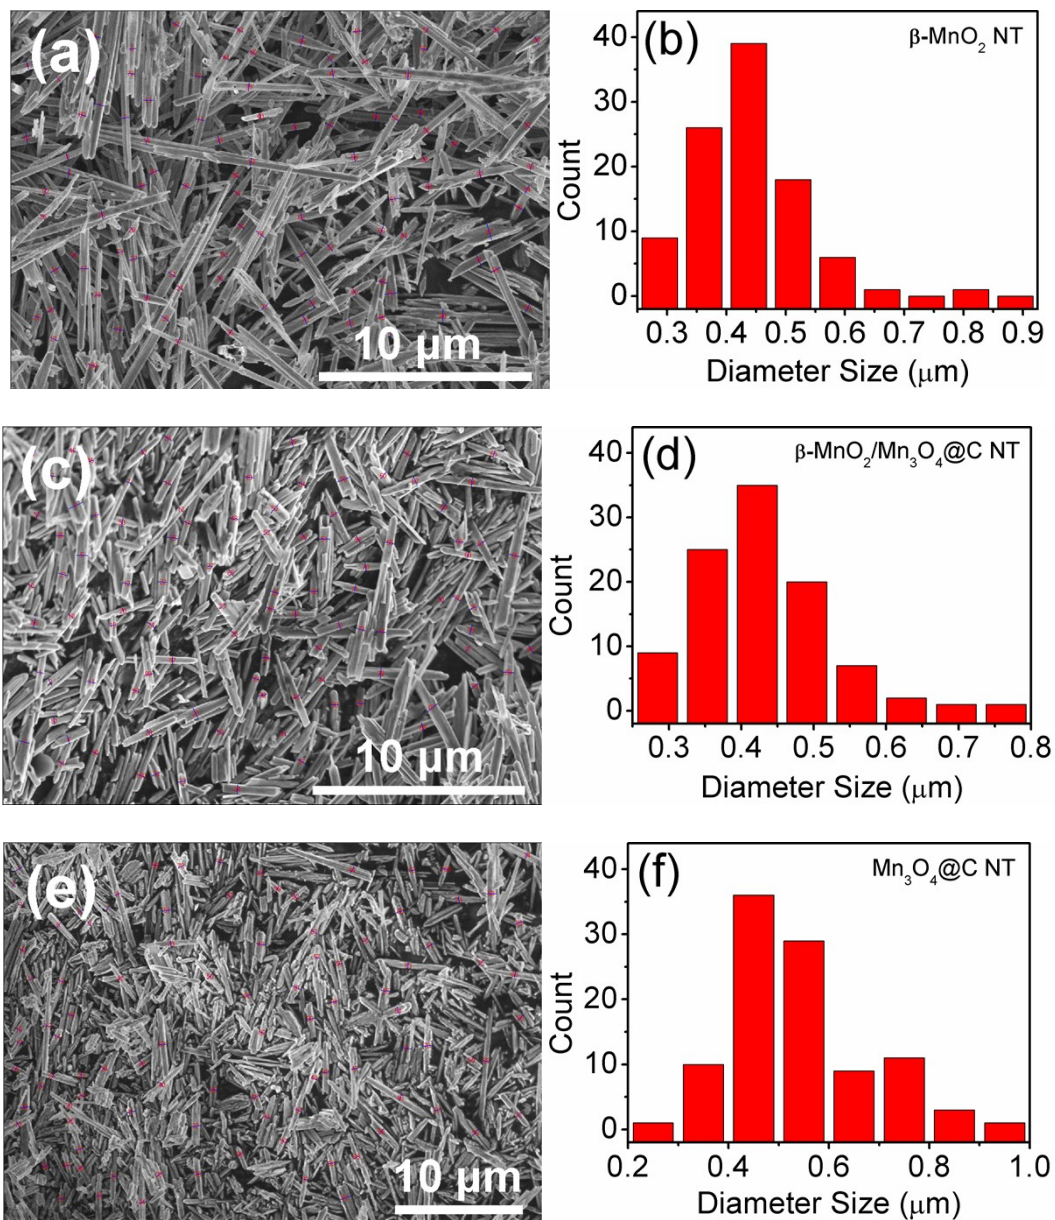

**Fig.S2** SEM image sampling and diameter frequency distribution for (a) and (b)  $\beta\text{-MnO}_2$  NT, (c) and (d)  $\beta\text{-MnO}_2/\text{Mn}_3\text{O}_4@\text{C}$  NT, (e) and (f)  $\text{Mn}_3\text{O}_4@\text{C}$  NT.

**Tab.S2** The average diameter of all manganese oxide nanotubes obtained from Fig.S4.

| Sample                                                 | Average Diameter (nm) |
|--------------------------------------------------------|-----------------------|
| $\beta\text{-MnO}_2$ NT                                | ~440                  |
| $\beta\text{-MnO}_2/\text{Mn}_3\text{O}_4@\text{C}$ NT | ~420                  |
| $\text{Mn}_3\text{O}_4@\text{C}$ NT                    | ~450                  |

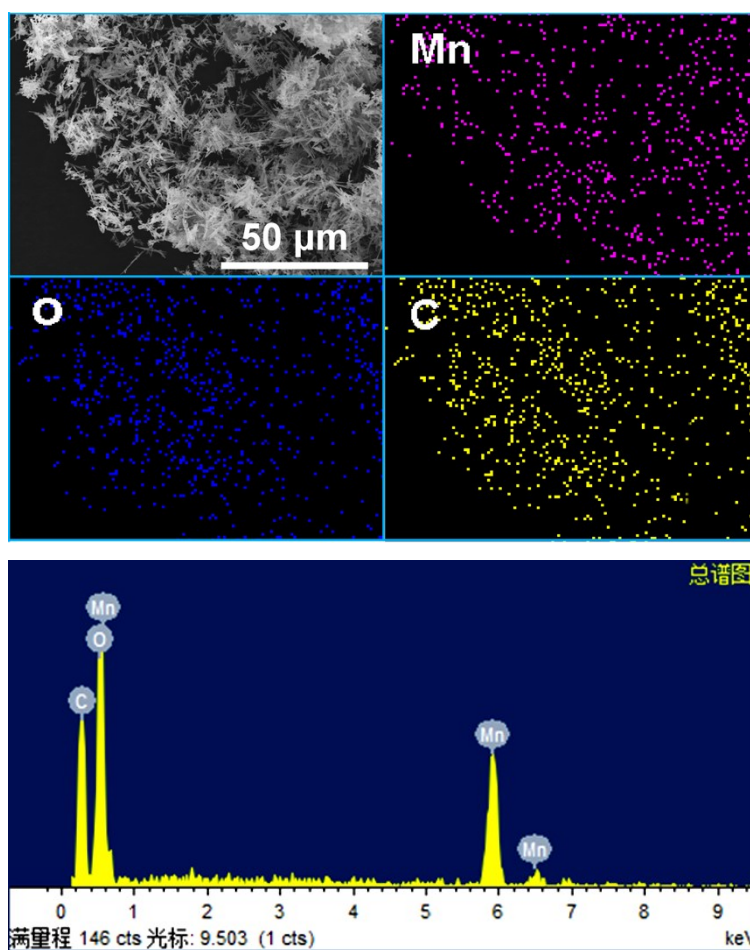

**Fig.S3** The EDS patterns of the  $\beta$ -MnO<sub>2</sub>/Mn<sub>3</sub>O<sub>4</sub>@C NT and its EDS elemental mappings.

**Tab.S3** According to the same equivalent circuit model, calculated Rs, Rct and C for  $\beta$ -MnO<sub>2</sub> NT, Mn<sub>3</sub>O<sub>4</sub>@C NT, and  $\beta$ -MnO<sub>2</sub>/Mn<sub>3</sub>O<sub>4</sub>@C NT at initial, respectively.

| Sample                                                          | initial  |           |         |
|-----------------------------------------------------------------|----------|-----------|---------|
|                                                                 | Rs (Ohm) | Rct (Ohm) | C (F)   |
| $\beta$ -MnO <sub>2</sub> NT                                    | 2.406    | 501.000   | 0.00327 |
| $\beta$ -MnO <sub>2</sub> /Mn <sub>3</sub> O <sub>4</sub> @C NT | 4.676    | 365.100   | 0.00652 |
| Mn <sub>3</sub> O <sub>4</sub> @C NT                            | 2.570    | 301.000   | 0.00278 |



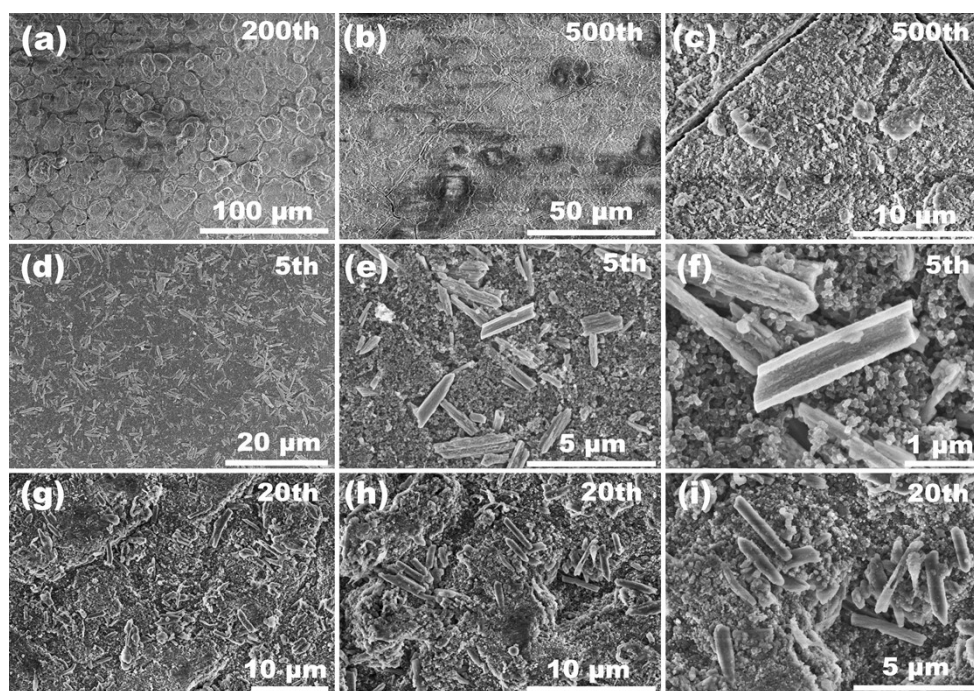

**Fig.S4** During the charge and discharge cycle, SEM images for (a)-(c) Mn<sub>3</sub>O<sub>4</sub>@C NT, (d)-(i) SEM images for β-MnO<sub>2</sub>/Mn<sub>3</sub>O<sub>4</sub>@C NT.

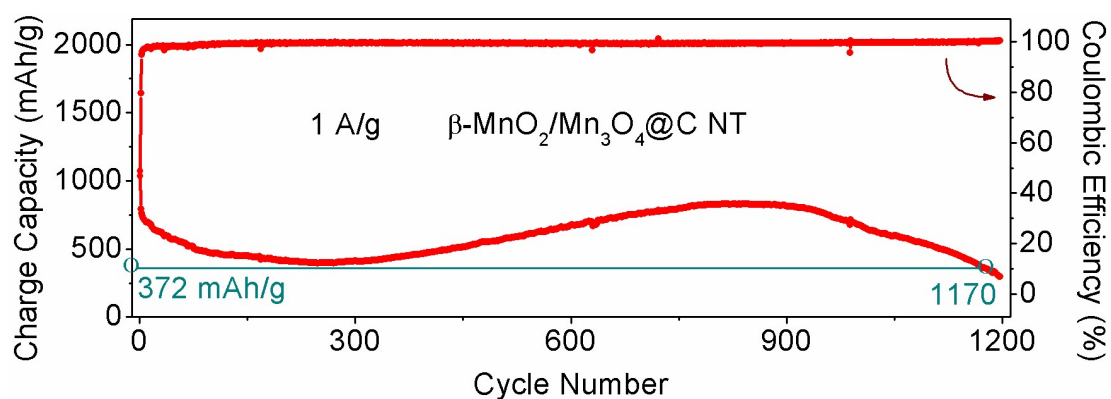

**Fig.S5** The cycle property for β-MnO<sub>2</sub>/Mn<sub>3</sub>O<sub>4</sub>@C NT at 1 A g<sup>-1</sup>.

**Tab.S4** Electrochemical performance of β-MnO<sub>2</sub>/Mn<sub>3</sub>O<sub>4</sub>@C NT electrodes in this work, compared with some other manganese oxides (eg. MnO, MnO<sub>2</sub>, Mn<sub>2</sub>O<sub>3</sub>, and Mn<sub>3</sub>O<sub>4</sub> etc.) electrodes reported in previous literature.

| Binder | Type of materials                                                                | Initial charge capacity                           | Cycle stability (1C = 936 mA g <sup>-1</sup> )                   |
|--------|----------------------------------------------------------------------------------|---------------------------------------------------|------------------------------------------------------------------|
| use    | This work                                                                        | 1137 mAh g <sup>-1</sup> at 0.2 A g <sup>-1</sup> | 679 mAh g <sup>-1</sup> after 1000 cycles at 1 A g <sup>-1</sup> |
| free   | Porous Mn <sub>3</sub> O <sub>4</sub> nanosheets@3D-Cu <sup>[1]</sup>            | 1166 mAh g <sup>-1</sup> at 0.2 A g <sup>-1</sup> | 668 mAh g <sup>-1</sup> after 1005 cycles at 1 A g <sup>-1</sup> |
| use    | MnCO <sub>3</sub> /Mn <sub>3</sub> O <sub>4</sub> /RGO composites <sup>[2]</sup> | 828 mAh g <sup>-1</sup> at 0.1 A g <sup>-1</sup>  | 532 mAh g <sup>-1</sup> after 800 cycles at 1 A g <sup>-1</sup>  |

|      |                                                                              |                                                   |                                                                     |
|------|------------------------------------------------------------------------------|---------------------------------------------------|---------------------------------------------------------------------|
| use  | Hollow Mn <sub>2</sub> O <sub>3</sub> Core-shell Microspheres <sup>[3]</sup> | 935 mAh g <sup>-1</sup> at 0.1 A g <sup>-1</sup>  | 620 mAh g <sup>-1</sup> after 500 cycles at 1 A g <sup>-1</sup>     |
| use  | MOFs-derived Porous Mn <sub>2</sub> O <sub>3</sub> <sup>[4]</sup>            | 852 mAh g <sup>-1</sup> at 0.5 A g <sup>-1</sup>  | 705 mAh g <sup>-1</sup> after 250 cycles at 1 A g <sup>-1</sup>     |
| use  | Porous MnO/C nanotubes <sup>[5]</sup>                                        | 810 mAh g <sup>-1</sup> at 0.1 A g <sup>-1</sup>  | 618 mAh g <sup>-1</sup> after 200 cycles at 0.5 A g <sup>-1</sup>   |
| use  | CNTs-entangled Mn <sub>3</sub> O <sub>4</sub> octahedrons <sup>[6]</sup>     | 780 mAh g <sup>-1</sup> at 0.19 A g <sup>-1</sup> | 678 mAh g <sup>-1</sup> after 400 cycles at 0.468 A g <sup>-1</sup> |
| use  | MnO <sub>2</sub> nanoflakes@carbon nanohorns <sup>[7]</sup>                  | 785 mAh g <sup>-1</sup> at 0.1 A g <sup>-1</sup>  | 552 mAh g <sup>-1</sup> after 50 cycles at 0.45 A g <sup>-1</sup>   |
| free | Porous MnO nanoflakes@Ni foam <sup>[8]</sup>                                 | 570 mAh g <sup>-1</sup> at 0.25 A g <sup>-1</sup> | 569 mAh g <sup>-1</sup> after 100 cycles at 0.25 A g <sup>-1</sup>  |
| use  | Mesoporous Mn <sub>2</sub> O <sub>3</sub> /RGO composites <sup>[9]</sup>     | 931 mAh g <sup>-1</sup> at 0.2 A g <sup>-1</sup>  | 1015 mAh g <sup>-1</sup> after 130 cycles at 0.23 A g <sup>-1</sup> |
| use  | Nanoflaky MnO <sub>2</sub> @carbon nanotubes <sup>[10]</sup>                 | 805 mAh g <sup>-1</sup> at 0.2 A g <sup>-1</sup>  | 620 mAh g <sup>-1</sup> after 50 cycles at 0.2 A g <sup>-1</sup>    |
| use  | MnO <sub>2</sub> /3D porous graphene composites <sup>[11]</sup>              | 927 mAh g <sup>-1</sup> at 0.1 A g <sup>-1</sup>  | 836 mAh g <sup>-1</sup> after 200 cycles at 0.1 A g <sup>-1</sup>   |
| use  | N-Doped MnO/Graphene Nanosheets <sup>[12]</sup>                              | 829 mAh g <sup>-1</sup> at 0.05 A g <sup>-1</sup> | 772 mAh g <sup>-1</sup> after 90 cycles at 0.1 A g <sup>-1</sup>    |
| use  | Mn <sub>3</sub> O <sub>4</sub> @RGO nanowires <sup>[13]</sup>                | 802 mAh g <sup>-1</sup> at 0.1 A g <sup>-1</sup>  | 702 mAh g <sup>-1</sup> after 100 cycles at 0.1 A g <sup>-1</sup>   |
| free | Mn <sub>2</sub> O <sub>3</sub> nanowires@Ti foil <sup>[14]</sup>             | 498 mAh g <sup>-1</sup> at 0.1 A g <sup>-1</sup>  | 502 mAh g <sup>-1</sup> after 100 cycles at 0.1 A g <sup>-1</sup>   |

---

\* Compared with some other manganese oxides (eg. MnO, MnO<sub>2</sub>, Mn<sub>2</sub>O<sub>3</sub>, and Mn<sub>3</sub>O<sub>4</sub> etc.), it is clearly seen that the  $\beta$ -MnO<sub>2</sub>/Mn<sub>3</sub>O<sub>4</sub>@C NT electrodes in this work exhibits the best property, particularly the cycle property at a high current density of 1 A g<sup>-1</sup>.

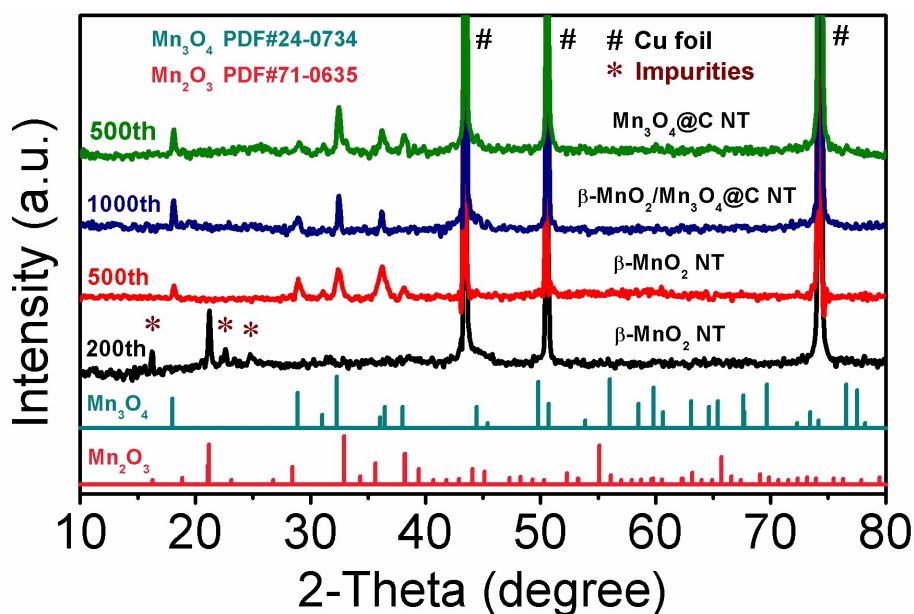

**Fig.S7** XRD patterns for three electrode materials for  $\beta$ -MnO<sub>2</sub> NT,  $\beta$ -MnO<sub>2</sub>/Mn<sub>3</sub>O<sub>4</sub>@C NT, and Mn<sub>3</sub>O<sub>4</sub>@C NT in different stages of the cycle under 1 A g<sup>-1</sup>, respectively.

**Tab.S5** The actual phase structure of the three electrode materials for  $\beta$ -MnO<sub>2</sub> NT,  $\beta$ -MnO<sub>2</sub>/Mn<sub>3</sub>O<sub>4</sub>@C NT, and Mn<sub>3</sub>O<sub>4</sub>@C NT in different stages of the cycle under 1 A g<sup>-1</sup> obtained from Fig.S9 and Fig. 2.

| Cycle number  | $\beta$ -MnO <sub>2</sub> NT   | $\beta$ -MnO <sub>2</sub> /Mn <sub>3</sub> O <sub>4</sub> @C NT | Mn <sub>3</sub> O <sub>4</sub> @C NT |
|---------------|--------------------------------|-----------------------------------------------------------------|--------------------------------------|
| initial phase | $\beta$ -MnO <sub>2</sub>      | $\beta$ -MnO <sub>2</sub> /Mn <sub>3</sub> O <sub>4</sub>       | Mn <sub>3</sub> O <sub>4</sub>       |
| 200th phase   | Mn <sub>2</sub> O <sub>3</sub> | —                                                               | —                                    |
| 500th phase   | Mn <sub>3</sub> O <sub>4</sub> | —                                                               | —                                    |
| 800th phase   | —                              | —                                                               | Mn <sub>3</sub> O <sub>4</sub>       |
| 1000th phase  | —                              | Mn <sub>3</sub> O <sub>4</sub>                                  | —                                    |

\* Because it takes much time to monitor the cycle process, it is very difficult. In order to reduce the workload, only limited nodes are selected for testing, but this does not affect the conclusion of the experiment.

### Reference

- [1] X.-Y. Fan, Y. Cui, P. Liu, L. Gou, L. Xu, D.-L. Li, PCCP 2016, 18, 22224.
- [2] R. Zhang, D. Wang, L. C. Qin, G. W. Wen, H. Pan, Y. F. Zhang, N. Tian, Y. Zhou, X. Huang, J. Mater. Chem. A 2017, 5.
- [3] C. Zhang, C. Guo, Y. Wei, L. Hou, Phys. Chem. Chem. Phys. 2016, 18, 4739.
- [4] Z. Bai, Y. Zhang, Y. Zhang, C. Guo, B. Tang, D. Sun, J. Mater. Chem. A 2015, 3, 5266.

- [5] G. L. Xu, Y. F. Xu, H. Sun, F. Fu, X. M. Zheng, L. Huang, J. T. Li, S. H. Yang, S. G. Sun, *Chem. Commun.* 2012, 48, 8502.
- [6] X. Cui, Y. Wang, Q. Xu, P. Sun, X. Wang, T. Wei, Y. Sun, *Nanotechnology* 2017, 28, 255402.
- [7] H. Lai, J. Li, Z. Chen, Z. Huang, *ACS Appl Mater Interfaces* 2012, 4, 2325.
- [8] X. Li, D. Li, L. Qiao, X. Wang, X. Sun, P. Wang, D. He, *J. Mater. Chem.* 2012, 22.
- [9] H. S. Jadhav, G. M. Thorat, B. B. Kale, J. G. Seo, *Dalton Trans* 2017, 46, 9777.
- [10] H. Xia, M. O. Lai, L. Lu, *J. Mater. Chem.* 2010, 20, 6896.
- [11] Y. Li, Q. Zhang, J. Zhu, X. L. Wei, P. K. Shen, *J. Mater. Chem. A* 2014, 2, 3163.
- [12] K. Zhang, P. Han, L. Gu, L. Zhang, Z. Liu, Q. Kong, C. Zhang, S. Dong, Z. Zhang, J. Yao, H. Xu, G. Cui, L. Chen, *ACS Appl Mater Interfaces* 2012, 4, 658.
- [13] J. G. Wang, D. Jin, R. Zhou, X. Li, X. R. Liu, C. Shen, K. Xie, B. Li, F. Kang, B. Wei, *Acs Nano* 2016, 10, 6227.
- [14] Y. Wang, Y. Wang, D. Jia, Z. Peng, Y. Xia, G. Zheng, *Nano Lett.* 2014, 14, 1080.
